# Supplementary material for: Mapping mania symptoms based on focal brain damage
Source: JCI journal article supplement (doi:10.1172/jci136096), 2020-08-23
Supplement: sd1 [file 1]

## **SUPPLEMENTARY MATERIAL**

### **Inclusion and Exclusion Criteria**

Inclusion criteria:

- Subjects aged 18 years or older, regardless of gender, race or social status;
- Patients presenting an episode of behavioral change lasting 4 or more days characterized by elevated, expansive, or irritable mood, and abnormally increased energy. Additionally, at least three of the following were present: inflated self-esteem/grandiosity, decreased need for sleep, excessive talkativeness, flight of ideas, distractibility, increased goal-directed activity, and excessive involvement in activities with potentially harmful consequences.
- Reports not providing details on behavioral changes as defined in the previous point remained eligible if authors explicitly stated that contemporary criteria for manic, hypomanic or mixed affective state were met.
- At least one confirmed (either in vivo or post-mortem) brain lesion caused by a tumor or a vascular insult, i.e. infarctions, hemorrhage, arterio-venous malformations, regardless of location, size and age of occurrence.
- The lesion must have occurred before the first manifestations of manic or mixed affective symptoms.
- Patients with brain lesion diagnosed or documented after the first manifestations of mania, BPD or mixed affective state were still considered eligible given unequivocal evidence that the lesion was acquired before the psychiatric manifestations developed (e.g. indolent tumor with neurologic signs prior to psychiatric manifestations).

Exclusion criteria:

- Diagnosis of manic episode or mixed affective state before the age of 18 years.
- Evidence of manic episode or mixed affective state prior to the occurrence of the brain insult, or when the chronological relationship between the two events was unclear or equivocal.
- Presumed brain lesion that was not confirmed by in vivo imaging or post-mortem methods.
- Presence of factors other than the structural brain-insult that may have induced the manic episode, including, but not limited to, use of anti-depressant medication, corticosteroids or illicit substances, treatment with electroconvulsive therapy or deep-brain stimulation, or diagnosis of endocrine conditions or infection.
- Lesions depicted in group diagrams, when it was not possible to individualize each patient lesion.

## **Search Terms**

**PubMed:** ((bipolar disorder) OR (manic) OR (mania)) AND ((cerebral) OR (cerebellum) OR (brain) OR (central nervous system)) AND ((injury) OR (tumor) OR (neoplasm) OR (mass) OR (infection) OR (abscess) OR (cyst) OR (stroke) OR (hemorrhage) OR (bleeding))

**Web of Science:** TS=(bipolar disorder OR manic OR mania) AND TS=(cerebral OR cerebellum OR brain OR central nervous system) AND TS=(lesion OR focus OR injury OR tumor OR neoplasm OR mass OR infection OR abscess OR cyst OR stroke OR hemorrhage OR bleeding) NOT TS=(animal OR monkey OR chimpanzee OR mouse OR mice OR rat OR cat OR dog OR rabbit OR bird OR fish OR child)

## Supplementary Figures

**Figure S1. Overlap in lesion location for each mania lesion cohort.** In the mania lesion cohort derived from a systematic literature search (N=41), where lesion locations are defined in two-dimensions (2D), maximum overlap (black arrows) included only 6/41 lesions and occurred in the right temporal lobe and right basal ganglia (A). In a mania lesion cohort derived from chart review at an academic medical center (N=15), where lesion locations are defined in three-dimensions, maximum overlap (blue arrow) included 12/15 lesions and occurred in the right superior frontal lobe (B). Note that lesion locations are heterogeneous between cohorts: regions of maximum overlap in the literature cohort were only impacted by one lesion in the clinical cohort (black arrows in panel B), while maximum overlap in the clinical cohort was not impacted by any lesion in the literature cohort (blue arrows in panel A).

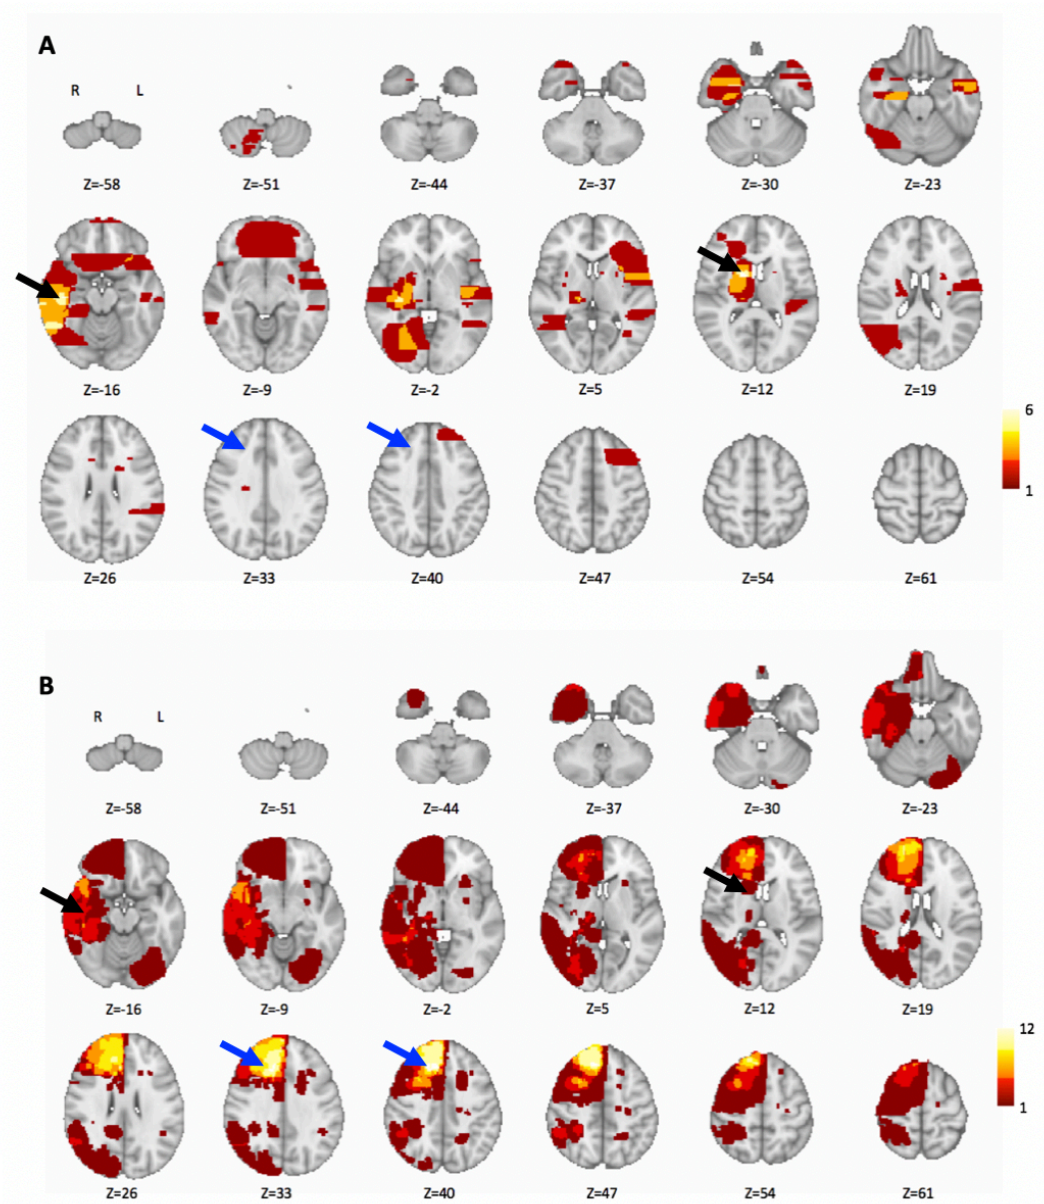

Figure S2. Additional brain slices for mania lesion network maps.

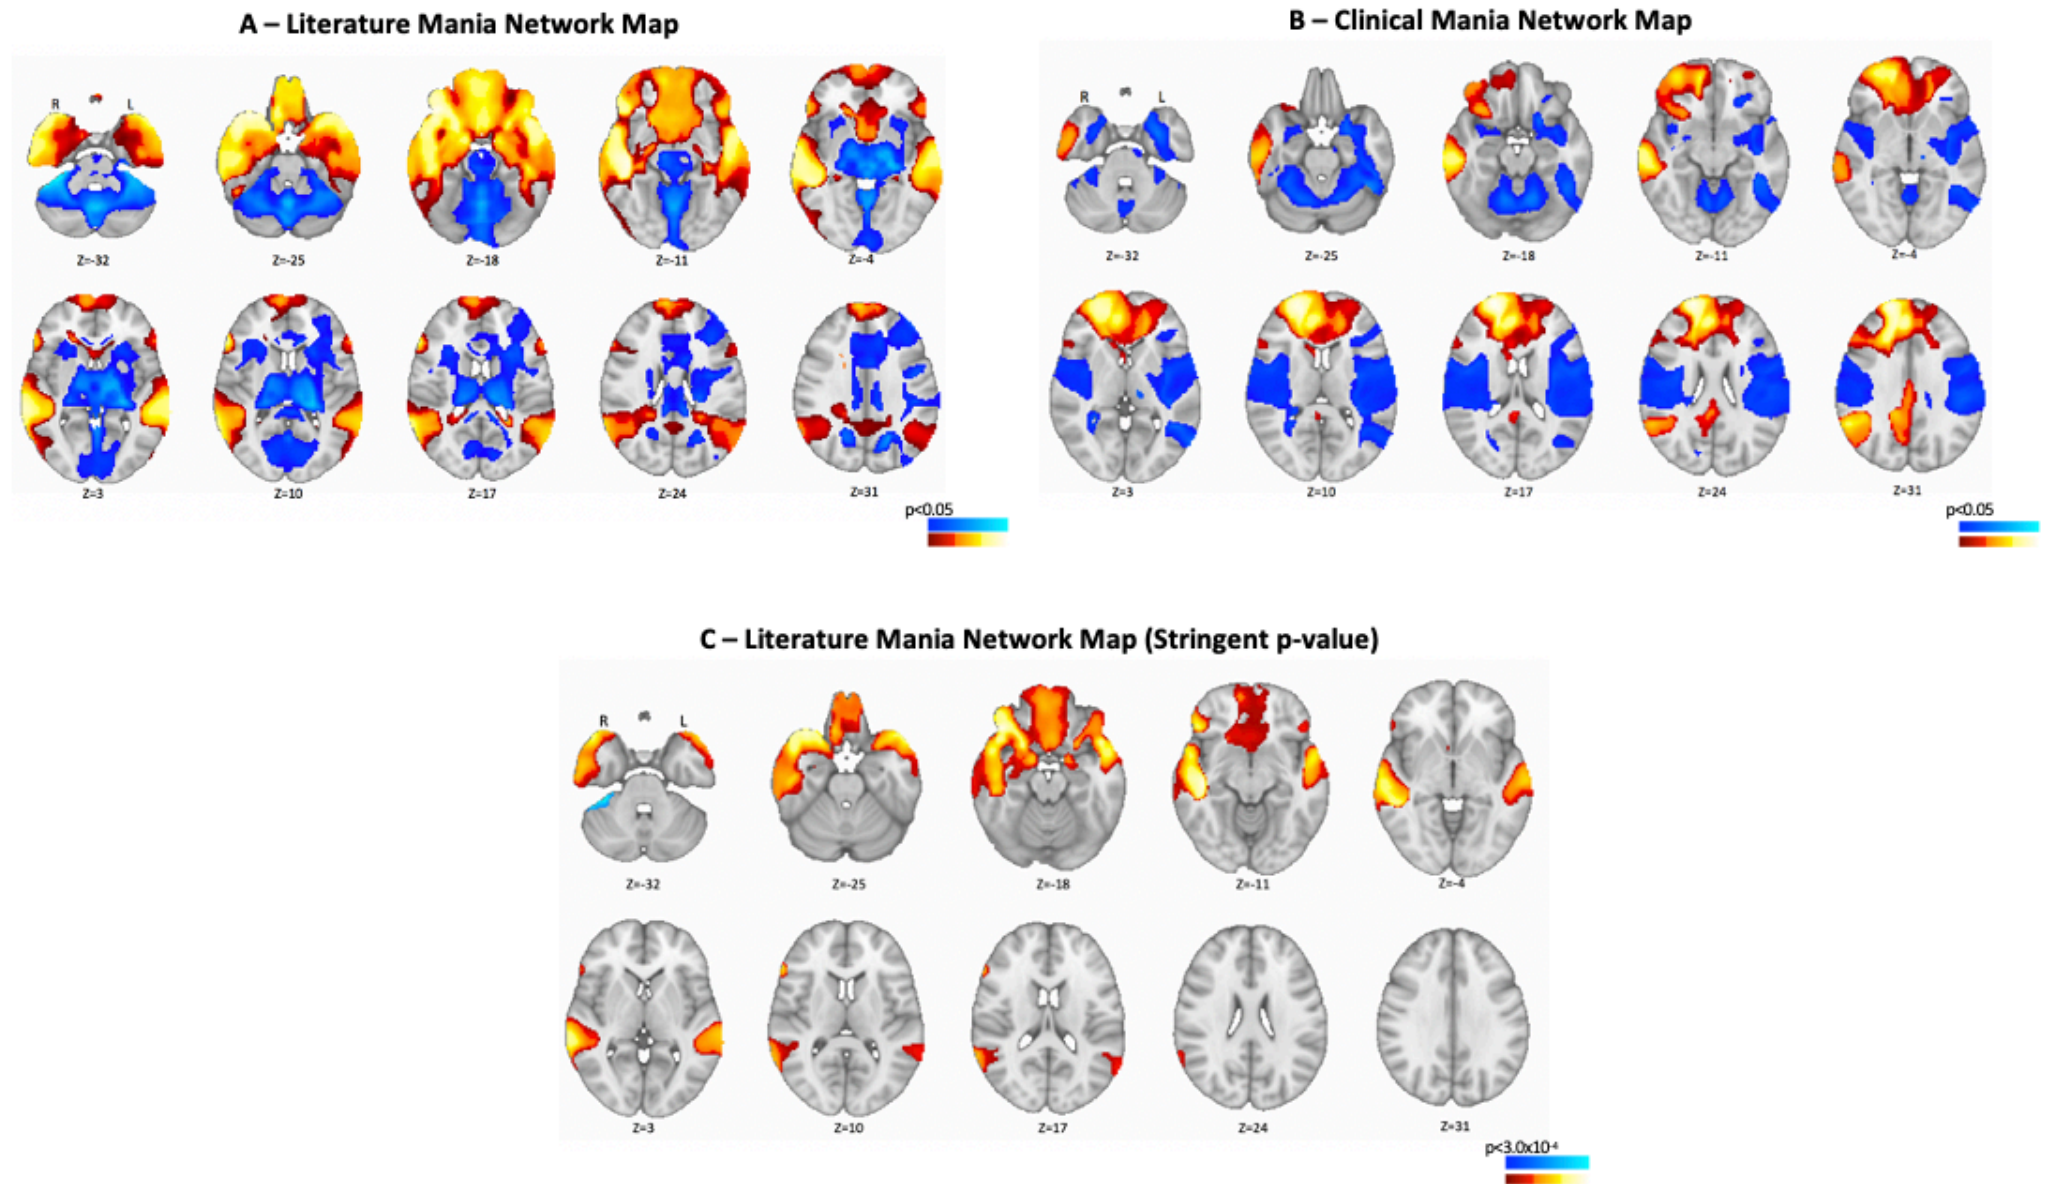

**Figure S2. Additional brain slices for mania lesion network maps.** Mania lesion network maps were obtained by statistically comparing lesion network maps from each mania cohort to lesion network maps from the respective control cohort. The literature mania lesion cohort (n = 41) was compared to a cohort of lesions causing several non-psychiatric symptoms (asterixis, aphasia, freezing of gait and post stroke pain), obtained from similar literature searches (n=79) (**A**). The clinical mania lesion cohort (n = 15) was compared to a cohort of control lesions from a database of stroke lesions not associated with any specific symptoms (n=490) (**B**). The mania lesion network maps in panels **A** and **B** were obtained using a voxel-wise permutation-based two-sample t-test performed within FSL PALM (two thousand permutations) and were corrected for multiple comparisons using threshold free cluster enhancement and displayed at an FWE-corrected level of  $p < 0.05$ . A more stringent voxel-based FWE-corrected level of  $p < 3.0 \times 10^{-4}$  was used also used for the literature mania lesion network map, to enhance demonstration of the peak regions of that map (**C**). Warm and cold colors represent areas that are more or less connected to mania lesions as compared to controls, respectively.



Figure S3. Reliability of lesion tracing and network mapping techniques.

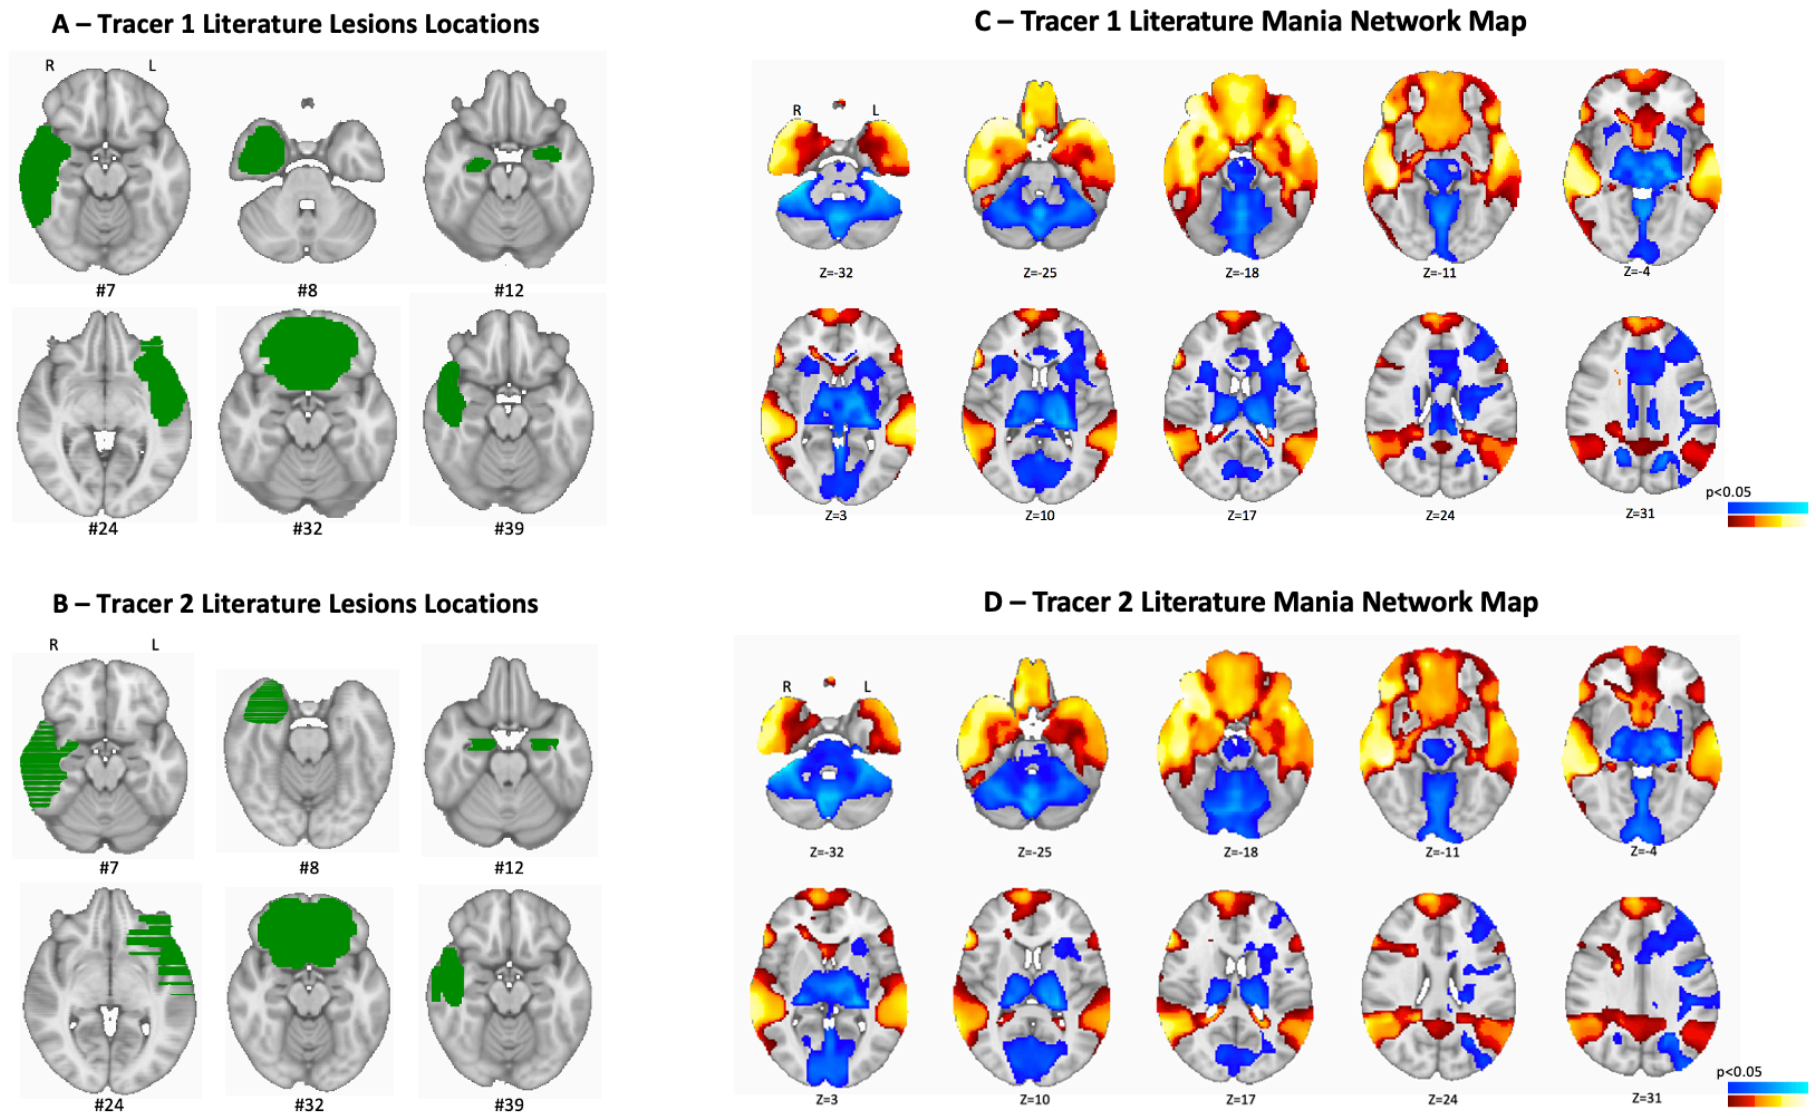

**Figure S3. Reliability of lesion tracing and network mapping techniques.** All 41 literature lesions were traced by two independent tracers onto a standard brain atlas, six representative example lesions are shown (**A & B**). To quantify the reliability of the tracing technique, the median distance between the center of gravity (CoG) for tracings of the same lesion was computed (8mm; 3 voxels) and was compared to the median distance between the CoG for different lesions (51mm; 26 voxels,  $p < 0.00001$ ). Literature mania lesion network maps contrasting each of the two sets of independent tracings of the mania lesions ( $n=41$ ) with a set of control lesions ( $N=79$ ) were also similar, with high spatial correlation (Pearson's  $r=0.96$ ) reflecting very strong to excellent agreement between the two maps (**C & D**). Panels C and D were obtained using a voxel-wise permutation-based two-sample t-test performed within FSL PALM (two thousand permutations), corrected for multiple comparisons using threshold free cluster enhancement and displayed at an FWE-corrected level of  $p < 0.05$ . Warm and cold colors represent areas that are more or less connected to mania lesions as compared to controls, respectively.



**Figure S4. Additional brain slices for the conjunction and combined mania lesion network maps.**

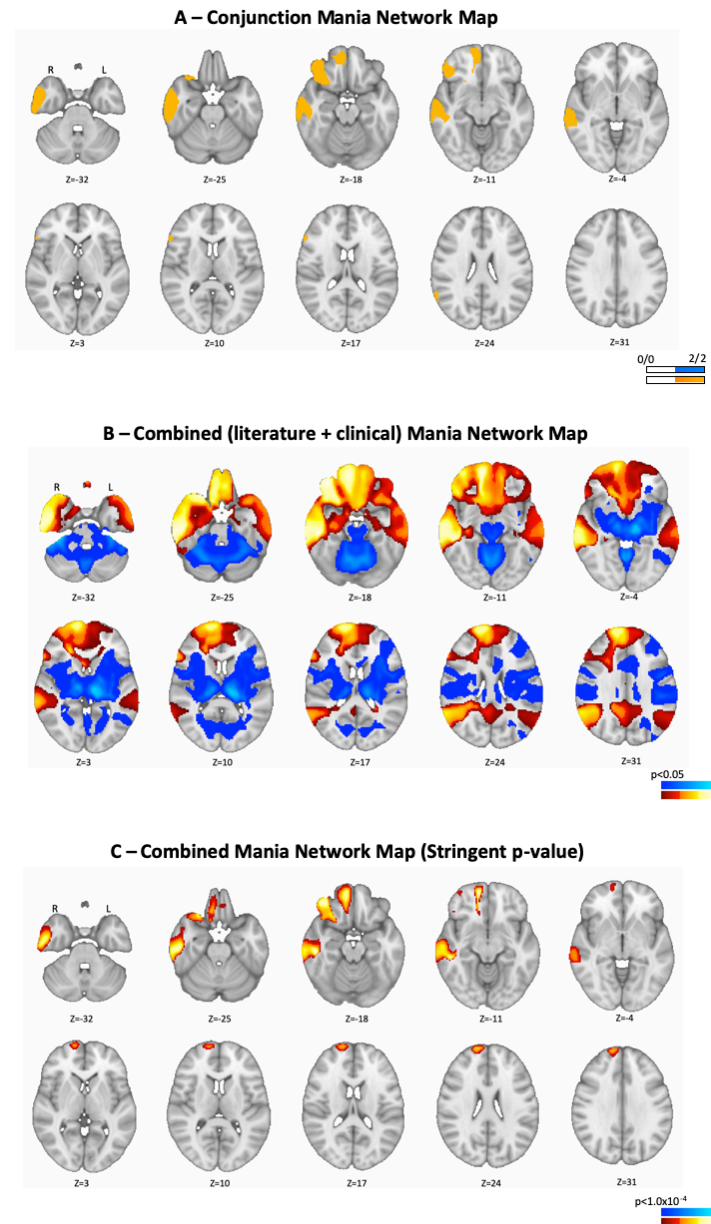

**Figure S4. Additional brain slices for the conjunction and combined mania lesion network maps.** A conjunction of the mania lesion network map derived from the literature cohorts and the mania lesion network map derived from the clinical cohorts shows connections significantly associated with mania in both cohorts tested independently (**A**). This conjunction map was obtained by binarizing the maps depicted in figures S2B and S2C and computing their overlap. A combined mania lesion network map, obtained using a voxel-wise permutation-based two-sample t-test performed within FSL PALM (two thousand permutations). shows connections significantly associated with mania when including all mania lesion locations (n=56) and all control lesion locations (n=569) in a single combined analysis, including lesion dimensionality (2D in literature lesions vs. 3D in clinical lesions) as a covariate (**B**). Panel B was corrected for multiple comparisons using threshold free cluster enhancement and displayed at an FWE-corrected level of  $p < 0.05$ . A more stringent voxel-based FWE-corrected level of  $p < 1.0 \times 10^{-4}$  was used to enhance demonstration of peak regions of connectivity in the combined map (**C**). Warm and cold colors represent areas that are more or less connected to mania lesions as compared to controls, respectively.

**Figure S5. Overlap of peak coordinates in the mania lesion network map with Brodmann Areas.**

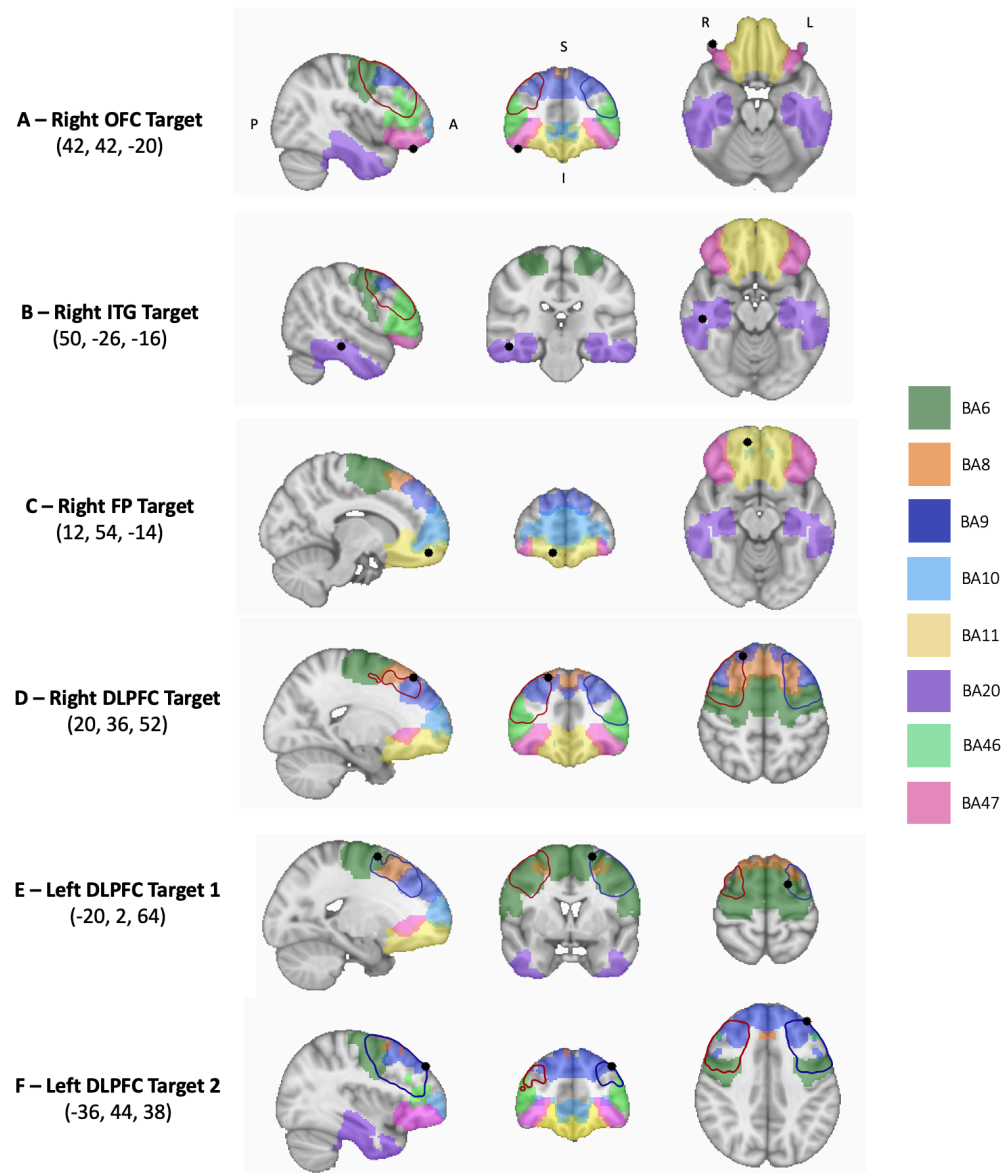

**Figure S5. Overlap of peak coordinates in the mania lesion network map with Brodmann Areas.** Peak coordinates from our combined mania lesion network map were identified across the entire brain (**A-C**, see Table S3), as well as in the right and left dorsolateral prefrontal cortex (**D-F**, see main text). In each image, the peak coordinate is represented as a black dot overlaid on a map of Brodmann areas. The outline for our a priori regions of interest in the left (blue outline) and right (red outline) dorsolateral prefrontal cortex are also shown for panels D-F. The positive peak in the right orbitofrontal cortex (OFC) overlaps with BA47 (pink) (**A**), while that in the right inferior temporal gyrus (ITG) overlaps with BA20 (purple) (**B**). The site in the right frontal pole (FP) overlaps with BA11 (yellow), very close to BA10 (light blue) (**C**). The positive peak in the right DLPFC overlaps with BA8 (orange) and BA9 (dark blue) (**D**), while the negative peaks in the left DLPFC overlap with BA6 (dark green), very close to BA8 (orange) (**E**) and with BA9 (dark blue) (**F**). Two negative peaks are reported for the left DLPFC since two distinct clusters of negative connectivity were found in the combined mania network map within this ROI (see Figure 7 in main text). Due to close proximity to some of the aforementioned areas, BA46 (light green) is also represented.

**Figure S6. Intersection of subthalamic nucleus (STN) deep brain stimulation (DBS) sites with our mania lesion network map.** DBS coordinates (A) previously associated with mania (red region) are slightly offset from the average STN DBS site (blue region). Intersection of these DBS sites with our combined mania lesion network map (B), is consistent with increased connectivity with the lesion network map at the mania inducing DBS site (red outline) compared to the standard DBS site (blue outline). Note that both STN DBS sites fall on negative regions in our mania lesion network, thus we would expect the overall incidence of mania following STN DBS to be low, but with greater *relative* risk at the mania inducing DBS site. Connectivity map in panel B was obtained using a voxel-wise permutation-based two-sample t-test performed within FSL PALM (two thousand permutations).

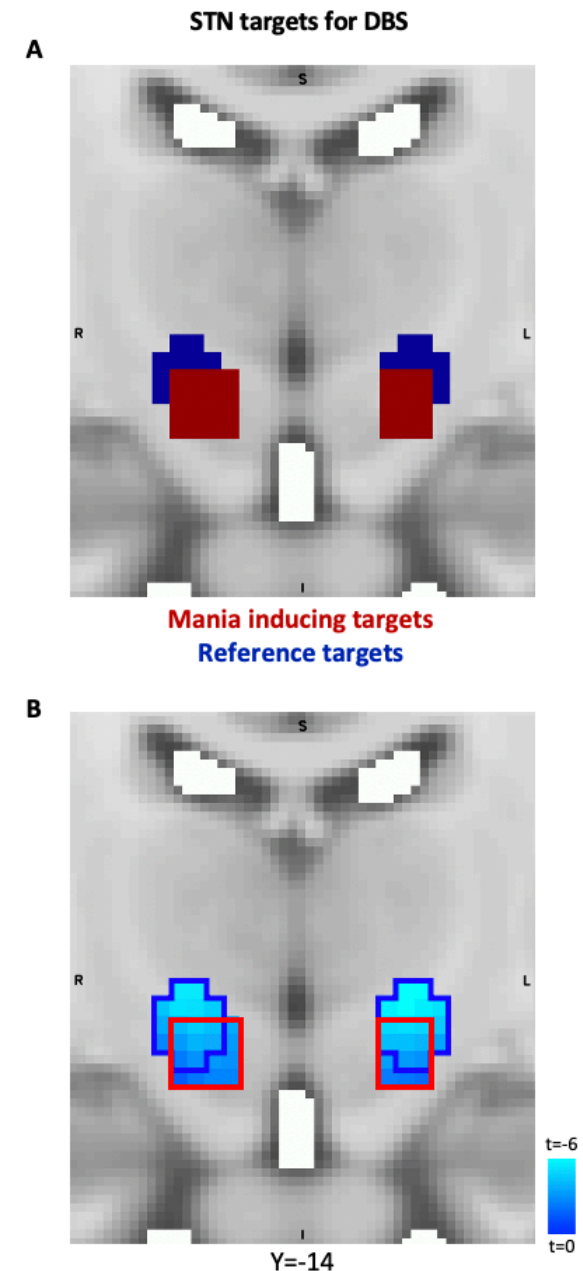

## Supplementary Tables

**Table S1.** Demographics and clinical information for literature cases of lesion-induced mania.

| Case # | Author                | Year | Age (M) | Gender | Time E-M | Scan    | Lesion Side | Etiology           | D* | FH* | MM Recur. | Depr. Recur. | DSM 5 Criteria* |    |    |    |    |    |    |    |   |      |      |  |
|--------|-----------------------|------|---------|--------|----------|---------|-------------|--------------------|----|-----|-----------|--------------|-----------------|----|----|----|----|----|----|----|---|------|------|--|
|        |                       |      |         |        |          |         |             |                    |    |     |           |              | A               | B1 | B2 | B3 | B4 | B5 | B6 | B7 | C | Psy. | n.d. |  |
| 1      | Antelmi, E. (1)       | 2014 | 50      | Female | 1y       | MRI     | Bilateral   | Infarction         | 0  |     |           |              | 1               |    | 1  |    |    | 1  | 1  |    |   |      |      |  |
| 2      | Asghar-Ali, A. A. (2) | 2004 | 50      | Female | n.d.     | MRI     | Bilateral   | Multiple Sclerosis | 0  |     |           |              |                 |    |    | 1  | 1  |    | 1  |    | 1 | 1    |      |  |
| 3      | Belli, H. (3)         | 2012 | 62      | Male   | n.d.     | MRI     | Left        | Infarction         | 0  |     | 0         | 0            | 1               | 1  | 1  | 1  | 1  |    | 1  | 1  | 1 | 1    |      |  |
| 4      | Benjamin, S. (4)      | 2000 | 41      | Male   | 1w       | MRI     | Left        | AVM                | 0  |     | 1         | 0            | 1               | 0  | 1  | 1  |    |    | 1  |    |   | 0    |      |  |
| 5      | Benke, T. (5)         | 2002 | 38      | Male   | 48h      | MRI     | Bilateral   | Infarction         | 0  |     | 0         | 0            | 1               | 1  |    | 1  | 1  | 1  | 1  |    |   | 0    |      |  |
| 6      | Bogousslavsky, J. (6) | 1988 | 72      | Female | i        | CT      | Right       | Infarction         | 0  |     | 0         | 0            | 1               |    |    | 1  | 1  |    | 1  |    |   |      |      |  |
| 7      | Bornke, C. (7)        | 1998 | 67      | Female | n.d.     | CT      | Right       | Infarction         | 0  |     | 0         | 0            | 1               | 1  | 1  | 1  | 1  |    | 1  |    | 1 | 1    |      |  |
| 8      | Brooks, J. O. (8)     | 2005 | 60      | Male   | n.d.     | MRI     | Right       | Tumor              | 1  |     | 0         | 0            | 1               | 1  | 1  | 1  |    |    | 1  |    | 1 | 1    |      |  |
| 9      | Claude, H. (9)        | 1928 | 52      | Female | n.d.     | Autopsy | Right       | Tumor              | 0  |     |           |              | 1               | 1  | 1  | 1  | 1  |    | 1  |    | 1 | 1    |      |  |
| 10     | Danel, T. (10)        | 1989 | 57      | Male   | 11m      | CT      | Right       | Infarction         | 0  |     | 1         | 1            |                 |    |    |    |    |    |    |    |   |      | 1    |  |
| 11     | Das, P. (11)          | 2015 | 86      | Male   | 1m       | MRI     | Right       | Infarction         | 0  |     | 1         |              | 1               | 1  | 1  | 1  | 1  |    | 1  |    | 1 | 1    |      |  |
| 12     | Filley, C. M. (12)    | 1995 | 56      | Female | n.d.     | MRI     | Bilateral   | Tumor              | 1  |     |           |              |                 |    |    | 1  | 1  |    | 1  |    |   |      |      |  |
| 13     | Haq, M. Z. (13)       | 2009 | 26      | Female | n.d.     | CT      | Bilateral   | Tumor              | 0  |     | 0         | 0            | 1               | 1  | 1  | 1  |    | 1  | 1  |    | 1 | 1    |      |  |
| 14     | Hunt, N. (14)         | 1990 | n.d.    | Female | n.d.     | CT      | Right       | AVM                | 1  |     | 1         | 1            | 1               | 1  |    |    |    |    | 1  |    |   |      |      |  |
| 15     | Koreki, A. (15)       | 2012 | 68      | Male   | 6w       | CT      | Right       | Hemorrhage         | 0  |     | 0         | 0            | 1               |    | 1  | 1  | 1  |    | 1  |    |   |      |      |  |
| 16     | Kulisevsky, J. (16)   | 1993 | 81      | Female | <3d      | MRI     | Right       | Infarction         | 0  |     | 0         | 0            | 1               | 1  | 1  | 1  | 1  | 1  | 1  |    | 1 | 1    |      |  |
| 17     | Liu, C. Y. (17)       | 1996 | 48      | Male   | 4m       | MRI     | Left        | Infarction         | 0  |     | 0         | 0            | 1               | 1  | 1  | 1  | 1  |    | 1  |    |   | 0    |      |  |
| 18     | Modrego, P. J. (18)   | 2000 | 19      | Female | 2m       | MRI     | Bilateral   | Multiple Sclerosis | 0  | 1   | 1         |              | 1               |    | 1  | 1  | 1  |    | 1  |    | 1 | 1    |      |  |
| 19     | Mumoli, N. (19)       | 2013 | 55      | Male   | n.d.     | MRI     | Right       | Tumor              | 1  |     | 1         |              | 1               |    |    |    |    | 1  | 1  | 1  |   |      |      |  |
| 20     | Nagaratnam,           | 2006 | 72      | Female | 3y       | CT      | Left        | Infarction         | 0  |     |           |              | 1               |    | 1  | 1  | 1  |    | 1  |    |   |      |      |  |
| 21     | N. (20)               |      | 80      | Male   | n.d.     | CT      | Bilateral   | Infarction         | 0  |     |           |              |                 | 1  |    | 1  | 1  |    |    | 1  |   | 1    | 1    |  |

| Case # | Author                          | Year | Age (M) | Gender | Time E-M | Scan   | Lesion Side | Etiology   | D* | FH* | MM Recur. | Depr. Recur. | DSM 5 Criteria* |    |    |    |    |    |    |    |   |      |      |
|--------|---------------------------------|------|---------|--------|----------|--------|-------------|------------|----|-----|-----------|--------------|-----------------|----|----|----|----|----|----|----|---|------|------|
|        |                                 |      |         |        |          |        |             |            |    |     |           |              | A               | B1 | B2 | B3 | B4 | B5 | B6 | B7 | C | Psy. | n.d. |
| 22     | Okun, M. S. (21)                | 2003 | 72      | Female | i        | MRI    | Left        | Surgery    |    |     |           |              | 1               |    | 1  |    |    |    | 1  |    |   |      |      |
| 23     |                                 |      | 56      | Female | i        | MRI    | Bilateral   | Surgery    |    |     |           |              |                 | 1  | 1  | 1  |    |    | 1  |    |   |      |      |
| 24     | Pathak, A. (22)                 | 2014 | 65      | Male   | 2d       | CT     | Left        | Infarction | 0  |     |           |              | 1               | 1  | 1  | 1  |    |    | 1  |    | 1 | 1    |      |
| 25     | Rocha, F. F. (23)               | 2008 | 57      | Male   | n.d.     | MRI    | Right       | Infarction | 0  |     | 0         | 0            | 1               |    | 1  | 1  | 1  |    |    |    |   |      |      |
| 26     | Salazar-Calderon, V. H. P. (24) | 1993 | 27      | Female | n.d.     | CT     | Right       | Tumor      | 1  |     |           |              | 1               | 1  | 1  | 1  |    |    | 1  |    | 1 | 1    |      |
| 27     | Sidhom, Y. (25)                 | 2014 | 23      | Female | n.d.     | MRI    | Right       | Surgery    | 0  | 1   |           |              | 1               | 1  | 1  |    |    |    | 1  |    | 1 |      |      |
| 28     | Starkstein, S. E. (26)          | 1988 | 66      | Male   | 1y       | CT     | Bilateral   | Infarction | 0  | 1   |           |              | 1               | 1  | 1  | 1  |    |    | 1  |    | 1 | 1    |      |
| 29     |                                 |      | 35      | Female | n.d.     | CT     | Right       | Hemorrhage | 0  | 1   |           |              | 1               | 1  | 1  | 1  | 1  |    | 1  |    | 1 | 1    |      |
| 30     |                                 |      | 63      | Male   | 4w       | CT     | Bilateral   | Surgery    | 0  |     |           |              |                 | 1  | 1  |    |    |    | 1  | 1  | 1 | 1    |      |
| 31     |                                 |      | 61      | Female | i        | CT     | Right       | Surgery    | 0  |     | 1         |              | 1               |    | 1  | 1  |    |    | 1  |    |   |      |      |
| 32     |                                 |      | 48      | Female | n.d.     | CT     | Right       | Tumor      | 0  |     | 1         |              | 1               |    |    | 1  |    |    | 1  |    |   |      |      |
| 33     |                                 |      | 28      | Male   | i        | CT     | Right       | Surgery    | 0  | 0   | 1         |              | 1               | 1  |    | 1  | 1  |    | 1  |    | 1 | 1    |      |
| 34     | Starkstein, S. E. (27)          | 1990 | 55      | Male   | 4wk      | CT     | Right       | Infarction | 0  |     |           |              | 1               | 1  | 1  | 1  |    | 1  |    |    | 1 | 1    |      |
| 35     |                                 |      | 79      | Female | i        | CT     | Right       | Infarction | 0  |     | 1         |              | 1               | 1  | 1  | 1  | 1  |    | 1  |    | 1 | 1    |      |
| 36     |                                 |      | 49±17   | Male   | n.d.     | CT     | Right       | Infarction | 0  |     |           |              | 1               | 1  | 1  | 1  | 1  |    | 1  | 1  | 1 | 1    |      |
| 37     |                                 |      |         | Male   |          | MRI    | Right       | Infarction | 0  |     |           |              | 1               | 1  | 1  | 1  | 1  |    | 1  | 1  | 1 | 1    |      |
| 38     |                                 |      |         | Male   |          | MRI    | Right       | AVM        | 0  | 1   |           |              | 1               | 1  | 1  | 1  | 1  |    | 1  | 1  | 1 | 1    |      |
| 39     |                                 |      |         | Male   |          | CT     | Right       | Hemorrhage | 0  |     |           |              | 1               | 1  | 1  | 1  | 1  |    | 1  | 1  | 1 | 1    |      |
| 40     | Stern, K. (28)                  | 1942 | 30      | Female | n.d.     | Scheme | Right       | Tumor      | 0  | 1   |           |              | 1               |    | 1  | 1  | 1  |    | 1  |    | 1 |      |      |
| 41     | Trillet, M. (29)                | 1995 | 71      | Male   | 2-3d     | MRI    | Left        | Hemorrhage | 0  |     |           |              | 1               |    | 1  | 1  | 0  |    | 1  |    | 0 | 0    |      |

AVM – Arteriovenous malformation; CT – Computerized tomography; d – days; D – Depressive episode before the event; Depr. – Depressive episode; E – Event; FH –

Family history of affective disorder or suicide; h – hours; Imm. – immediate after event; m – months; MM – Manic/mixed state episode; MRI – Magnetic resonance imaging;

n.d. – non defined; Psy. – Psychotic symptoms; Recur. – Recurrence of affective episode; w – weeks; y – years

\* 0 means absence; 1 means presence; blank means not defined/unknown



**Table S2.** Demographics and clinical information for clinical cases of lesion-induced mania.

| Case # | Age (MM) | Gender | Time E-MM | Scan | Lesion Side | Etiology   | D* | FH* | MM Recur.* | Depr. Recur.* | DSM 5 Criteria* |    |    |    |    |    |    |    |   |      |      |
|--------|----------|--------|-----------|------|-------------|------------|----|-----|------------|---------------|-----------------|----|----|----|----|----|----|----|---|------|------|
|        |          |        |           |      |             |            |    |     |            |               | A               | B1 | B2 | B3 | B4 | B5 | B6 | B7 | C | Psy. | n.d. |
| 1      | 64       | Female | 6m        | MRI  | Right       | Infarction | 0  |     |            |               | 1               |    | 1  |    |    | 1  | 1  |    | 1 | 1    |      |
| 2      | 47       | Female | i         | MRI  | Bilateral   | Infarction | 1  | 1   | 0          | 1             | 1               |    | 1  | 1  |    |    | 1  |    |   |      |      |
| 3      | 72       | Female | 1y        | MRI  | Right       | Infarction | 1  | 1   |            |               | 1               |    |    |    |    |    | 1  | 1  | 1 | 1    |      |
| 4      | 60       | Male   | n.d.      | MRI  | Right       | Tumor      | 1  |     | 0          | 0             | 1               |    | 1  |    | 1  | 1  | 1  |    |   |      |      |
| 5      | 70       | Female | n.d.      | MRI  | Right       | Hemorrhage |    |     |            |               | 1               |    |    |    | 1  | 1  | 1  |    | 1 |      |      |
| 6      | 50       | Male   | >3y       | MRI  | Right       | Infarction | 0  | 0   | 1          | 1             | 1               |    | 1  |    |    |    | 1  | 1  |   |      |      |
| 7      | 51       | Male   | >10y      | MRI  | Bilateral   | Tumor      | 1  | 0   | 0          | 1             | 1               | 1  | 1  | 1  | 1  |    | 1  | 1  |   |      |      |
| 8      | 33       | Male   | 8y        | MRI  | Right       | Tumor      | 0  | 0   | 1          | 1             | 1               |    | 1  |    |    |    | 1  | 1  |   |      |      |
| 9      | 64       | Female | 3y        | MRI  | Right       | Infarction | 0  | 0   | 0          | 0             | 1               |    |    | 1  | 1  |    | 1  | 1  | 1 |      |      |
| 10     | 79       | Female | 1m        | MRI  | Right       | Hemorrhage | 0  |     |            |               | 1               | 1  |    | 1  | 1  |    | 1  |    | 1 | 1    |      |
| 11     | 79       | Male   | n.d.      | MRI  | Bilateral   | Tumor      | 1  |     |            |               | 1               | 1  | 1  |    |    |    | 1  | 1  |   |      |      |
| 12     | 55       | Male   | i         | MRI  | Right       | Hemorrhage | 0  | 0   | 1          | 1             | 1               |    | 1  | 1  |    |    | 1  | 1  |   |      |      |
| 13     | 74       | Male   | >4y       | MRI  | Right       | Tumor      |    |     |            |               | 1               |    | 1  | 1  | 1  | 1  | 1  | 1  |   |      |      |
| 14     | 77       | Male   | 2y        | MRI  | Bilateral   | Hemorrhage | 0  | 0   | 1          | 0             |                 | 1  |    | 1  |    |    | 1  |    | 1 | 1    |      |
| 15     | 60       | Male   | <17y      | MRI  | Bilateral   | Tumor      | 0  | 1   | 1          | 0             | 1               |    |    | 1  |    |    | 1  | 1  | 1 |      |      |

D – Depressive episode before the event; Depr. – Depressive episode; E – Event; FH – Family history of affective disorder or suicide; i – immediate after event; m – months;

MM – Manic/mixed state episode; MRI – Magnetic resonance imaging; n.d. – non defined; Psy. – Psychotic symptoms; Recur. – Recurrence of affective episode; w – weeks;

y – years

\* 0 means absence; 1 means presence; blank means not defined/unknown

**Table S3.** Selected regions of interest in the mania lesion network map and respective peak coordinates.

| ROIs Anatomy<br>(Harvard-Oxford Atlas)                                              |                               | ROIs Peak |     |     |         |
|-------------------------------------------------------------------------------------|-------------------------------|-----------|-----|-----|---------|
|                                                                                     |                               | X         | Y   | Z   | T-value |
|    | Right Frontal Orbital Cortex  | 42        | 42  | -20 | 8.19    |
|   | Right Inferior Temporal Gyrus | 50        | -26 | -16 | 8.01    |
|  | Right Frontal Pole            | 12        | 54  | -14 | 7.95    |

Three regions of interest (ROI) were identified in the combined mania lesion network map (see Figure S4C, voxel-based FWE-corrected  $p < 1 \times 10^{-4}$ ) using a Python 2 notebook, *nilearn*, and a clustered volume threshold of  $200 \text{ mm}^3$ . The resulting ROIs were the right orbitofrontal cortex, right inferior temporal gyrus and right frontal pole, according to the Harvard-Oxford atlas (red regions). Peak coordinates within each ROI were identified from the combined mania lesion network map using *fslstats*.

## Supplementary References:

1. Antelmi E, Fabbri M, Cretella L, Guarino M, and Stracciari A. Late onset bipolar disorder due to a lacunar state. *Behav Neurol*. 2014;2014:780742.
2. Asghar-Ali AA, Taber KH, Hurley RA, and Hayman LA. Pure neuropsychiatric presentation of multiple sclerosis. 2014.
3. Belli H, Akbudak M, Ural C, and Kulacaoglu F. Solitary lesion in ponto-mesencephalic area related secondary mania: a case report. *Psychiatr Danub*. 2012;24(2):223-5.
4. Benjamin S, Kirsch D, Visscher T, Ozbayrak KR, and Weaver JP. Hypomania from left frontal AVM resection. *Neurology*. 2000;54(6):1389-90.
5. Benke T, Kurzthaler I, Schmidauer C, Moncayo R, and Donnemiller E. Mania caused by a diencephalic lesion. *Neuropsychologia*. 2002;40(3):245-52.
6. Bogousslavsky J, Ferrazzini M, Regli F, Assal G, Tanabe H, and Delaloye-Bischof A. Manic delirium and frontal-like syndrome with paramedian infarction of the right thalamus. *J Neurol Neurosurg Psychiatry*. 1988;51(1):116-9.
7. Bornke C, Postert T, Przuntek H, and Buttner T. Acute mania due to a right hemisphere infarction. *European Journal of Neurology*. 1998;5(4):407-9.
8. Brooks JO, 3rd, and Hoblyn JC. Secondary mania in older adults. *Am J Psychiatry*. 2005;162(11):2033-8.
9. Claude H, Baruk H, Lamache A, and Cuel J. Manic Excitation and Cerebral Tumor. *Encephale-Revue De Psychiatrie Clinique Biologique Et Therapeutique*. 1928;23(1):9-19.
10. Danel T, et al. Mood disorders and right hemisphere infarction. *Encephale*. 1989;15(6):549-53.
11. Das P, Chopra A, Rai A, and Kuppuswamy PS. Late-onset recurrent mania as a manifestation of Wallenberg syndrome: a case report and review of the literature. *Bipolar Disorders*. 2015;17(6):677-82.
12. Filley CM, and Kleinschmidt-DeMasters BK. Neurobehavioral presentations of brain neoplasms. *West J Med*. 1995;163(1):19-25.
13. Haq MZ, Dubey I, Khess CR, Das U, and Kumar R. Bipolar disorder and tuberous sclerosis complex: is it a mere coincidence? *CNS Spectr*. 2009;14(11):643-7.
14. Hunt N, and Silverstone T. Seasonal affective disorder following brain injury. *The British journal of psychiatry : the journal of mental science*. 1990;156:884-6.
15. Koreki A, Takahata K, Tabuchi H, and Kato M. Increased left anterior insular and inferior prefrontal activity in post-stroke mania. *BMC Neurol*. 2012;12:68.
16. Kulisevsky J, Berthier ML, and Pujol J. Hemiballismus and Secondary Mania Following a Right Thalamic Infarction. *Neurology*. 1993;43(7):1422-4.
17. Liu CY, Wang SJ, Fuh JL, Yang YY, and Liu HC. Bipolar disorder following a stroke involving the left hemisphere. *Australian and New Zealand Journal of Psychiatry*. 1996;30(5):688-91.
18. Modrego PJ, and Ferrandez J. Familial multiple sclerosis with repetitive relapses of manic psychosis in two patients (mother and daughter). *Behavioural Neurology*. 2000;12(4):175-9.

19. Mumoli N, Pulera F, Vitale J, and Camaiti A. Frontal lobe syndrome caused by a giant meningioma presenting as depression and bipolar disorder. *Singapore Med J*. 2013;54(8):e158-9.
20. Nagaratnam N, Wong KK, and Patel I. Secondary mania of vascular origin in elderly patients: a report of two clinical cases. *Arch Gerontol Geriatr*. 2006;43(2):223-32.
21. Okun MS, Bakay RA, DeLong MR, and Vitek JL. Transient manic behavior after pallidotomy. *Brain and cognition*. 2003;52(2):281-3.
22. Pathak A, and Srivastava M. Post-stroke mania—a case report. *ASEAN Journal of Psychiatry*. 2014;15(2):209-12.
23. Rocha FF, Carneiro JG, Pereira Pde A, Correa H, and Teixeira AL. Poststroke manic symptoms: an unusual neuropsychiatric condition. *Rev Bras Psiquiatr*. 2008;30(2):173-4.
24. Salazar-Calderon Perriggo VH, Oommen KJ, and Sobonya RE. Silent solitary right parietal chondroma resulting in secondary mania. *Clin Neuropathol*. 1993;12(6):325-9.
25. Sidhom Y, et al. Bipolar Disorder and Multiple Sclerosis: A Case Series. *Behavioural Neurology*. 2014.
26. Starkstein SE, Boston JD, and Robinson RG. Mechanisms of mania after brain injury. 12 case reports and review of the literature. *J Nerv Ment Dis*. 1988;176(2):87-100.
27. Starkstein SE, et al. Mania after brain injury: neuroradiological and metabolic findings. *Ann Neurol*. 1990;27(6):652-9.
28. Stern K, and Dancey TE. Glioma of the diencephalon in a manic patient. *American Journal of Psychiatry*. 1942;98(5):716-9.
29. Trillet M, Vighetto A, Croisile B, Charles N, and Aimard G. Hemiballismus with logorrhea and thymo-affective disinhibition caused by hematoma of the left subthalamic nucleus. *Rev Neurol (Paris)*. 1995;151(6-7):416-9.

STROBE Statement—checklist of items that should be included in reports of observational studies

|                              | Item No. | Recommendation                                                                                                                                                                       | Page No.                  |
|------------------------------|----------|--------------------------------------------------------------------------------------------------------------------------------------------------------------------------------------|---------------------------|
| Title and abstract           | 1        | (a) Indicate the study’s design with a commonly used term in the title or the abstract                                                                                               | 1                         |
|                              |          | (b) Provide in the abstract an informative and balanced summary of what was done and what was found                                                                                  | 4-5                       |
| Introduction                 |          |                                                                                                                                                                                      |                           |
| Background/rationale         | 2        | Explain the scientific background and rationale for the investigation being reported                                                                                                 | 6                         |
| Objectives                   | 3        | State specific objectives, including any prespecified hypotheses                                                                                                                     | 6                         |
| Methods                      |          |                                                                                                                                                                                      |                           |
| Study design                 | 4        | Present key elements of study design early in the paper                                                                                                                              | 16-20                     |
| Setting                      | 5        | Describe the setting, locations, and relevant dates, including periods of recruitment, exposure, follow-up, and data collection                                                      | 16-20<br>1-2 (Supp. Mat.) |
| Participants                 | 6        | (a) Cohort study—Give the eligibility criteria, and the sources and methods of selection of participants. Describe methods of follow-up                                              |                           |
|                              |          | Case-control study—Give the eligibility criteria, and the sources and methods of case ascertainment and control selection. Give the rationale for the choice of cases and controls   | 16-20<br>1-2 (Supp. Mat.) |
|                              |          | Cross-sectional study—Give the eligibility criteria, and the sources and methods of selection of participants                                                                        |                           |
|                              |          | (b) Cohort study—For matched studies, give matching criteria and number of exposed and unexposed                                                                                     | 16-20                     |
|                              |          | Case-control study—For matched studies, give matching criteria and the number of controls per case                                                                                   | 1-2 (Supp.)               |
| Variables                    | 7        | Clearly define all outcomes, exposures, predictors, potential confounders, and effect modifiers. Give diagnostic criteria, if applicable                                             | 16-20                     |
| Data sources/<br>measurement | 8*       | For each variable of interest, give sources of data and details of methods of assessment (measurement). Describe comparability of assessment methods if there is more than one group | 16-20                     |
| Bias                         | 9        | Describe any efforts to address potential sources of bias                                                                                                                            | 18-20                     |
| Study size                   | 10       | Explain how the study size was arrived at                                                                                                                                            | 16-17                     |

Continued on next page

|                        |     |                                                                                                                                                                                                              |                      |
|------------------------|-----|--------------------------------------------------------------------------------------------------------------------------------------------------------------------------------------------------------------|----------------------|
| Quantitative variables | 11  | Explain how quantitative variables were handled in the analyses. If applicable, describe which groupings were chosen and why                                                                                 | 16-20                |
| Statistical methods    | 12  | (a) Describe all statistical methods, including those used to control for confounding                                                                                                                        | 17-23                |
|                        |     | (b) Describe any methods used to examine subgroups and interactions                                                                                                                                          | 18-20                |
|                        |     | (c) Explain how missing data were addressed                                                                                                                                                                  | 18-20                |
|                        |     | (d) <i>Cohort study</i> —If applicable, explain how loss to follow-up was addressed                                                                                                                          | 16-20                |
|                        |     | <i>Case-control study</i> —If applicable, explain how matching of cases and controls was addressed                                                                                                           |                      |
|                        |     | <i>Cross-sectional study</i> —If applicable, describe analytical methods taking account of sampling strategy                                                                                                 |                      |
|                        |     | (e) Describe any sensitivity analyses                                                                                                                                                                        | 18-20                |
| <b>Results</b>         |     |                                                                                                                                                                                                              |                      |
| Participants           | 13* | (a) Report numbers of individuals at each stage of study—eg numbers potentially eligible, examined for eligibility, confirmed eligible, included in the study, completing follow-up, and analysed            | 7-8<br>14-16 (Supp.) |
|                        |     | (b) Give reasons for non-participation at each stage                                                                                                                                                         | NA                   |
|                        |     | (c) Consider use of a flow diagram                                                                                                                                                                           | NA                   |
| Descriptive data       | 14* | (a) Give characteristics of study participants (eg demographic, clinical, social) and information on exposures and potential confounders                                                                     | 7-8<br>14-16 (Supp.) |
|                        |     | (b) Indicate number of participants with missing data for each variable of interest                                                                                                                          | 14-16 (Supp.)        |
|                        |     | (c) <i>Cohort study</i> —Summarise follow-up time (eg, average and total amount)                                                                                                                             | 14-16 (Supp.)        |
| Outcome data           | 15* | <i>Cohort study</i> —Report numbers of outcome events or summary measures over time                                                                                                                          | 7-8<br>14-16 (Supp.) |
|                        |     | <i>Case-control study</i> —Report numbers in each exposure category, or summary measures of exposure                                                                                                         | NA                   |
|                        |     | <i>Cross-sectional study</i> —Report numbers of outcome events or summary measures                                                                                                                           | NA                   |
| Main results           | 16  | (a) Give unadjusted estimates and, if applicable, confounder-adjusted estimates and their precision (eg, 95% confidence interval). Make clear which confounders were adjusted for and why they were included | 7-9                  |
|                        |     | (b) Report category boundaries when continuous variables were categorized                                                                                                                                    | 7-9                  |
|                        |     | (c) If relevant, consider translating estimates of relative risk into absolute risk for a meaningful time period                                                                                             | NA                   |

Continued on next page



|                          |    |                                                                                                                                                                            |       |
|--------------------------|----|----------------------------------------------------------------------------------------------------------------------------------------------------------------------------|-------|
| Other analyses           | 17 | Report other analyses done—eg analyses of subgroups and interactions, and sensitivity analyses                                                                             | 9-10  |
| <b>Discussion</b>        |    |                                                                                                                                                                            |       |
| Key results              | 18 | Summarise key results with reference to study objectives                                                                                                                   | 11    |
| Limitations              | 19 | Discuss limitations of the study, taking into account sources of potential bias or imprecision. Discuss both direction and magnitude of any potential bias                 | 14-15 |
| Interpretation           | 20 | Give a cautious overall interpretation of results considering objectives, limitations, multiplicity of analyses, results from similar studies, and other relevant evidence | 11-14 |
| Generalisability         | 21 | Discuss the generalisability (external validity) of the study results                                                                                                      | 11-14 |
| <b>Other information</b> |    |                                                                                                                                                                            |       |
| Funding                  | 22 | Give the source of funding and the role of the funders for the present study and, if applicable, for the original study on which the present article is based              | 25    |

\*Give information separately for cases and controls in case-control studies and, if applicable, for exposed and unexposed groups in cohort and cross-sectional studies.

**Note:** An Explanation and Elaboration article discusses each checklist item and gives methodological background and published examples of transparent reporting. The STROBE checklist is best used in conjunction with this article (freely available on the Web sites of PLoS Medicine at <http://www.plosmedicine.org/>, Annals of Internal Medicine at <http://www.annals.org/>, and Epidemiology at <http://www.epidem.com/>). Information on the STROBE Initiative is available at [www.strobe-statement.org](http://www.strobe-statement.org).

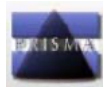

# PRISMA 2009 Checklist

| Section/topic                      | #  | Checklist item                                                                                                                                                                                                                                                                                              | Reported on page # |
|------------------------------------|----|-------------------------------------------------------------------------------------------------------------------------------------------------------------------------------------------------------------------------------------------------------------------------------------------------------------|--------------------|
| <b>TITLE</b>                       |    |                                                                                                                                                                                                                                                                                                             |                    |
| Title                              | 1  | Identify the report as a systematic review, meta-analysis, or both.                                                                                                                                                                                                                                         | 1                  |
| <b>ABSTRACT</b>                    |    |                                                                                                                                                                                                                                                                                                             |                    |
| Structured summary                 | 2  | Provide a structured summary including, as applicable: background; objectives; data sources; study eligibility criteria, participants, and interventions; study appraisal and synthesis methods; results; limitations; conclusions and implications of key findings; systematic review registration number. | 4-5                |
| <b>INTRODUCTION</b>                |    |                                                                                                                                                                                                                                                                                                             |                    |
| Rationale                          | 3  | Describe the rationale for the review in the context of what is already known.                                                                                                                                                                                                                              | 6                  |
| Objectives                         | 4  | Provide an explicit statement of questions being addressed with reference to participants, interventions, comparisons, outcomes, and study design (PICOS).                                                                                                                                                  | 6                  |
| <b>METHODS</b>                     |    |                                                                                                                                                                                                                                                                                                             |                    |
| Protocol and registration          | 5  | Indicate if a review protocol exists, if and where it can be accessed (e.g., Web address), and, if available, provide registration information including registration number.                                                                                                                               | 16                 |
| Eligibility criteria               | 6  | Specify study characteristics (e.g., PICOS, length of follow-up) and report characteristics (e.g., years considered, language, publication status) used as criteria for eligibility, giving rationale.                                                                                                      | 16; 1-2 (Supp.)    |
| Information sources                | 7  | Describe all information sources (e.g., databases with dates of coverage, contact with study authors to identify additional studies) in the search and date last searched.                                                                                                                                  | 3 (Supp.)          |
| Search                             | 8  | Present full electronic search strategy for at least one database, including any limits used, such that it could be repeated.                                                                                                                                                                               | 3 (Supp.)          |
| Study selection                    | 9  | State the process for selecting studies (i.e., screening, eligibility, included in systematic review, and, if applicable, included in the meta-analysis).                                                                                                                                                   | 16; 1-2 (Supp.)    |
| Data collection process            | 10 | Describe method of data extraction from reports (e.g., piloted forms, independently, in duplicate) and any processes for obtaining and confirming data from investigators.                                                                                                                                  | 16; 1-2 (Supp.)    |
| Data items                         | 11 | List and define all variables for which data were sought (e.g., PICOS, funding sources) and any assumptions and simplifications made.                                                                                                                                                                       | 16; 14-16 (Supp.)  |
| Risk of bias in individual studies | 12 | Describe methods used for assessing risk of bias of individual studies (including specification of whether this was done at the study or outcome level), and how this information is to be used in any data synthesis.                                                                                      | 18-20              |
| Summary measures                   | 13 | State the principal summary measures (e.g., risk ratio, difference in means).                                                                                                                                                                                                                               | 17-20              |
| Synthesis of results               | 14 | Describe the methods of handling data and combining results of studies, if done, including measures of consistency (e.g., $I^2$ ) for each meta-analysis.                                                                                                                                                   | 17-20              |



# PRISMA 2009 Checklist

| Section/topic                 | #  | Checklist item                                                                                                                                                                                           | Reported on page #            |
|-------------------------------|----|----------------------------------------------------------------------------------------------------------------------------------------------------------------------------------------------------------|-------------------------------|
| Risk of bias across studies   | 15 | Specify any assessment of risk of bias that may affect the cumulative evidence (e.g., publication bias, selective reporting within studies).                                                             | 17-20                         |
| Additional analyses           | 16 | Describe methods of additional analyses (e.g., sensitivity or subgroup analyses, meta-regression), if done, indicating which were pre-specified.                                                         | 20-23                         |
| <b>RESULTS</b>                |    |                                                                                                                                                                                                          |                               |
| Study selection               | 17 | Give numbers of studies screened, assessed for eligibility, and included in the review, with reasons for exclusions at each stage, ideally with a flow diagram.                                          | 7; 1-2 (Supp.); 14-16 (Supp.) |
| Study characteristics         | 18 | For each study, present characteristics for which data were extracted (e.g., study size, PICOS, follow-up period) and provide the citations.                                                             | 7; 1-2 (Supp.); 14-16 (Supp.) |
| Risk of bias within studies   | 19 | Present data on risk of bias of each study and, if available, any outcome level assessment (see item 12).                                                                                                | 7-9                           |
| Results of individual studies | 20 | For all outcomes considered (benefits or harms), present, for each study: (a) simple summary data for each intervention group (b) effect estimates and confidence intervals, ideally with a forest plot. | 7-9                           |
| Synthesis of results          | 21 | Present results of each meta-analysis done, including confidence intervals and measures of consistency.                                                                                                  | 7-9                           |
| Risk of bias across studies   | 22 | Present results of any assessment of risk of bias across studies (see Item 15).                                                                                                                          | 7-9                           |
| Additional analysis           | 23 | Give results of additional analyses, if done (e.g., sensitivity or subgroup analyses, meta-regression [see Item 16]).                                                                                    | 9-11                          |
| <b>DISCUSSION</b>             |    |                                                                                                                                                                                                          |                               |
| Summary of evidence           | 24 | Summarize the main findings including the strength of evidence for each main outcome; consider their relevance to key groups (e.g., healthcare providers, users, and policy makers).                     | 11-14                         |
| Limitations                   | 25 | Discuss limitations at study and outcome level (e.g., risk of bias), and at review-level (e.g., incomplete retrieval of identified research, reporting bias).                                            | 14-15                         |
| Conclusions                   | 26 | Provide a general interpretation of the results in the context of other evidence, and implications for future research.                                                                                  | 15                            |
| <b>FUNDING</b>                |    |                                                                                                                                                                                                          |                               |
| Funding                       | 27 | Describe sources of funding for the systematic review and other support (e.g., supply of data); role of funders for the systematic review.                                                               | 25                            |

From: Moher D, Liberati A, Tetzlaff J, Altman DG, The PRISMA Group (2009). Preferred Reporting Items for Systematic Reviews and Meta-Analyses: The PRISMA Statement. PLoS Med 6(7): e1000097. doi:10.1371/journal.pmed1000097

For more information, visit: [www.prisma-statement.org](http://www.prisma-statement.org).
